# Supplementary material for: Early development of structural networks and the impact of prematurity on brain connectivity
Source: PubMed Central journal article supplement (PMC5387181; doi:10.1016/j.neuroimage.2017.01.065), 2017-04-01
Supplement: mmc1.pdf [file mmc1.pdf]

# Supplementary Material:

## Early development of structural networks and the impact of prematurity on brain connectivity

Dafnis Batalle<sup>a</sup>, Emer J Hughes<sup>a</sup>, Hui Zhang<sup>b</sup>, Jaques-Donald Tournier<sup>a</sup>, Nora Tusor<sup>a</sup>, Paul Aljabar<sup>a</sup>, Luqman Wali<sup>a</sup>, Daniel C Alexander<sup>b</sup>, Joseph V Hajnal<sup>a</sup>, Chiara Nosarti<sup>a</sup>, A David Edwards<sup>a</sup>, and Serena J Counsell<sup>a</sup>

a) Centre for the Developing Brain, Division of Imaging Sciences & Biomedical Engineering, King's College London, SE1 7EH London, United Kingdom b) Computer Science & Centre for Medical Image Computing, University College London, United Kingdom

### 1. SUPPLEMENTARY RESULTS: SMALL-WORLD NETWORK CHARACTERISTICS

#### Association with age at MRI:

By means of comparison with binary random equivalent networks maintaining the same size and degree distribution (Maslov and Sneppen, 2002), we obtained small-world coefficients: normalised characteristic path length ( $\alpha$ ), normalised clustering coefficient ( $\gamma$ ) and small-worldness ( $\sigma = \gamma / \alpha$ ) (Humphries and Gurney, 2008; Watts and Strogatz, 1998).  $\alpha$  was negatively correlated with age at MRI for a few network densities (around 0.3), while gamma was found positively correlated for higher densities, however, only small-worldness coefficient was significantly associated with age at MRI after cost-integration ( $\rho = 0.268$ ,  $p = 0.022$ ).

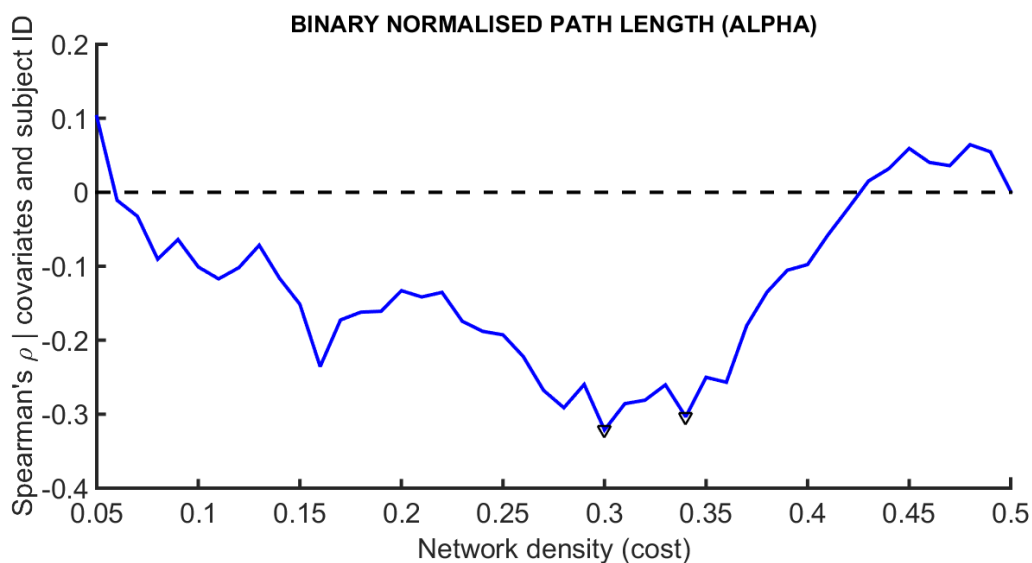

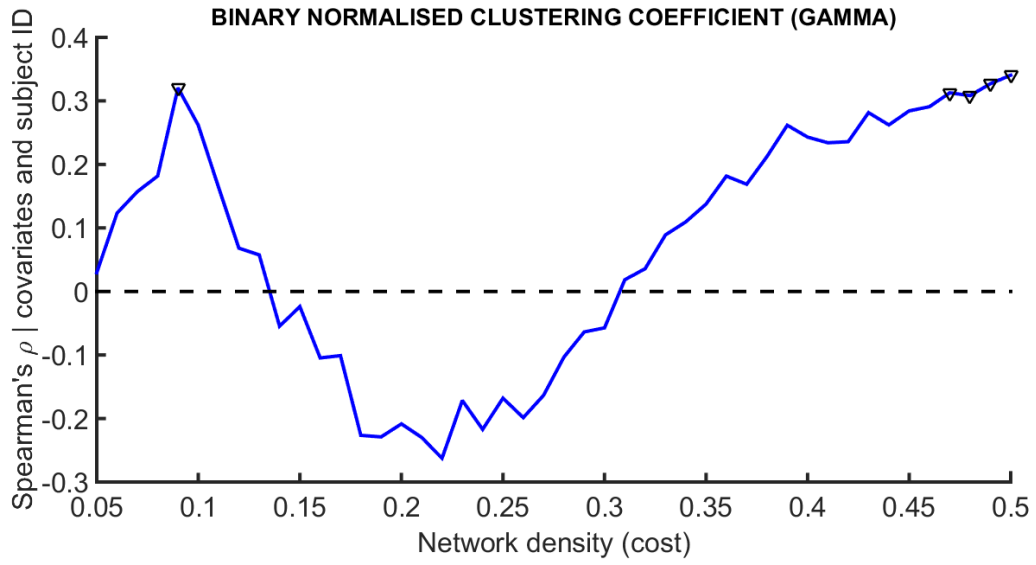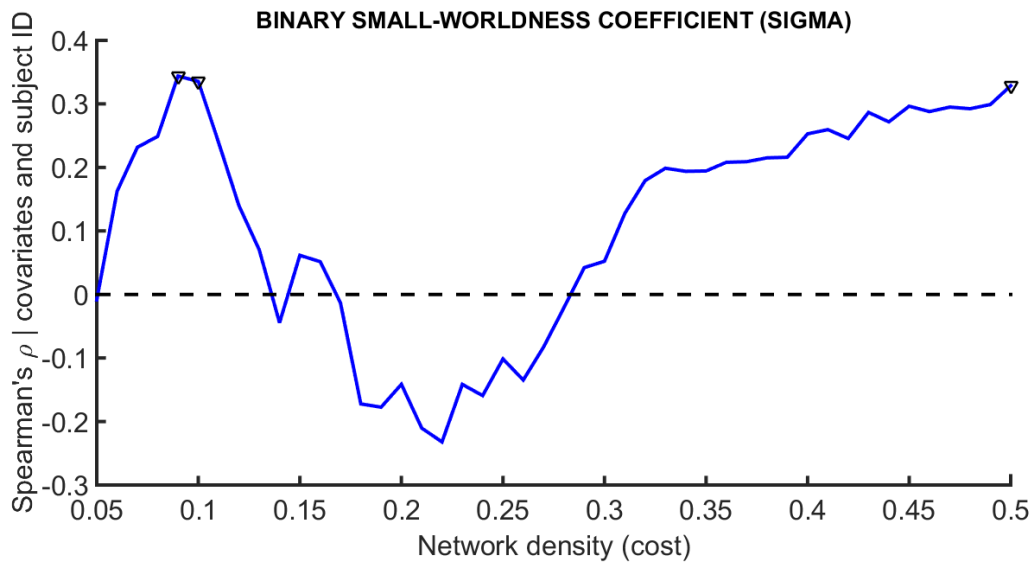

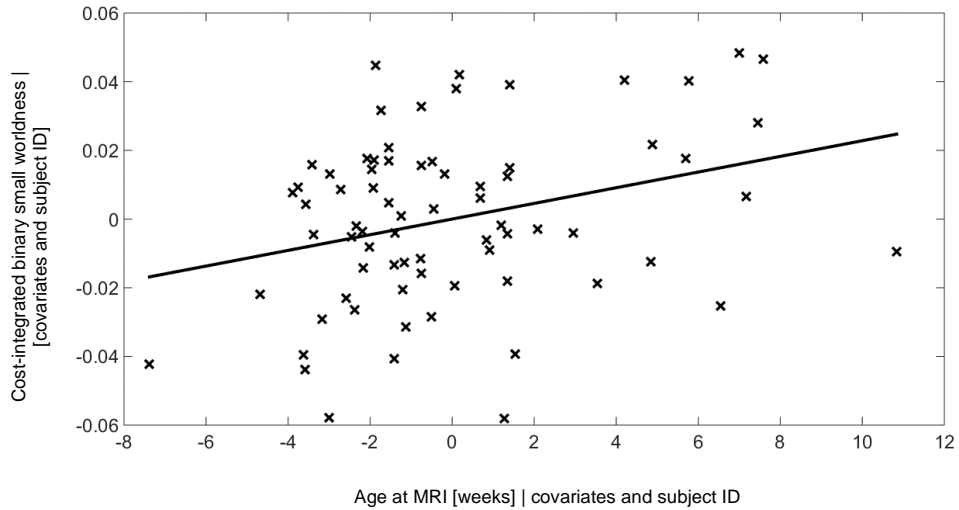

Weighted small-world features also show a significant association with age at MRI. FS-weighted  $\alpha$  shows a significant correlation with age at MRI (cost-integrated  $\rho=0.262$   $p=0.025$ ), while a negative correlation is found for FA-weighted (cost-integrated  $\rho=-0.231$   $p=0.049$ ), NDI-weighted (cost-integrated  $\rho=-0.261$   $p=0.026$ ) and (1-ODI)-weighted  $\alpha$  (cost-integrated  $\rho=-0.302$   $p=0.001$ ). Normalised clustering coefficient ( $\gamma$ ) was only found significantly correlated with age at MRI after cost-integration for FS-weighted networks ( $\rho=0.640$ ,  $p<0.001$ ). Similarly, small-worldness coefficient ( $\sigma$ ) was only significantly correlated for FS-weighted networks ( $\rho=0.240$ ,  $p=0.048$ ).

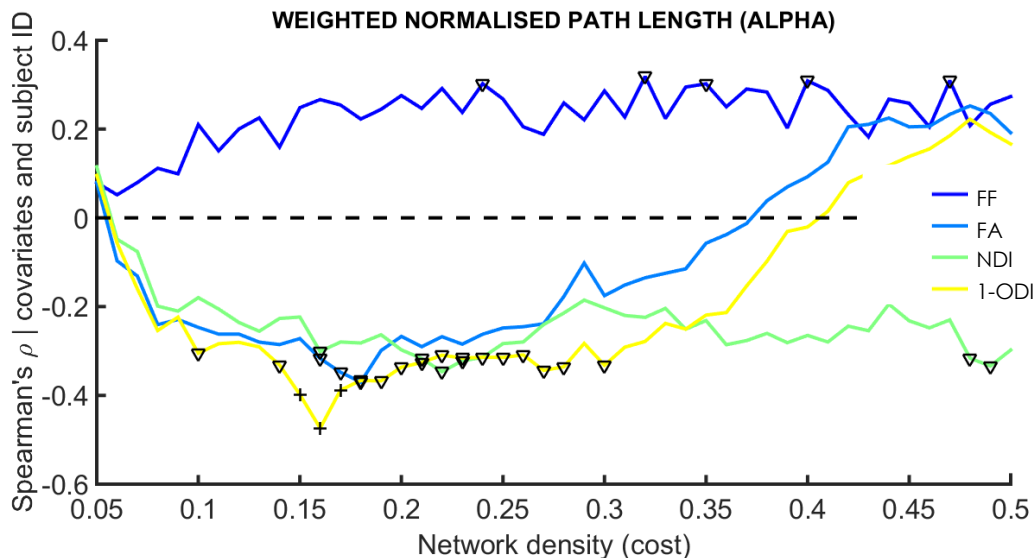

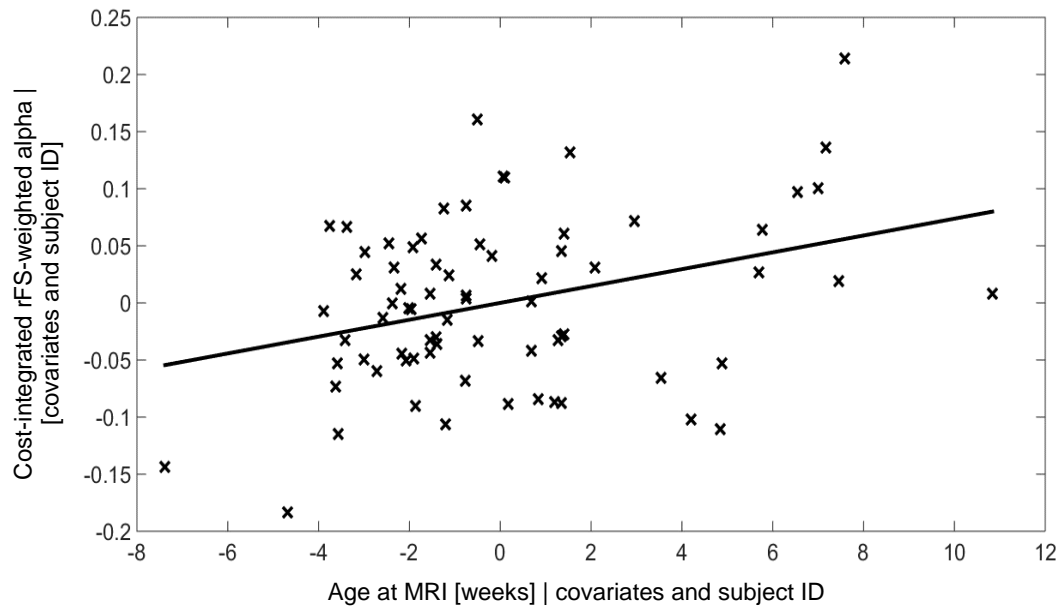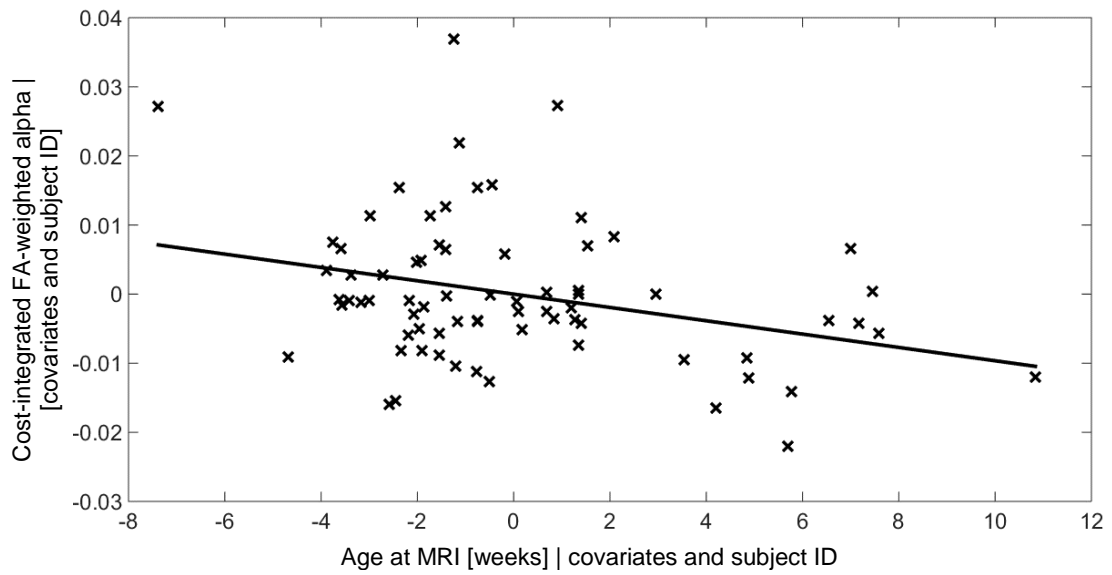

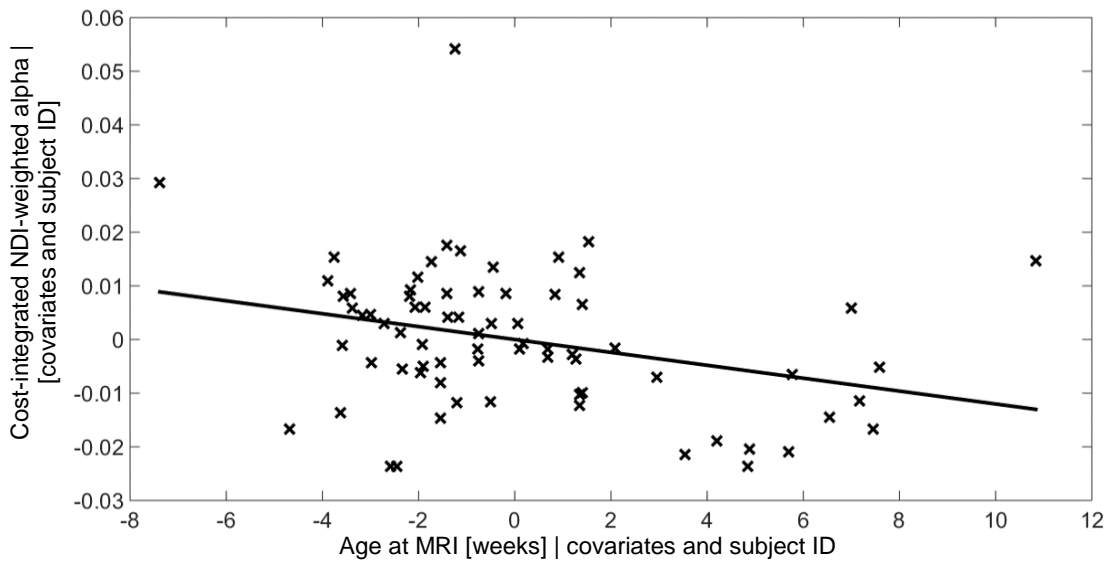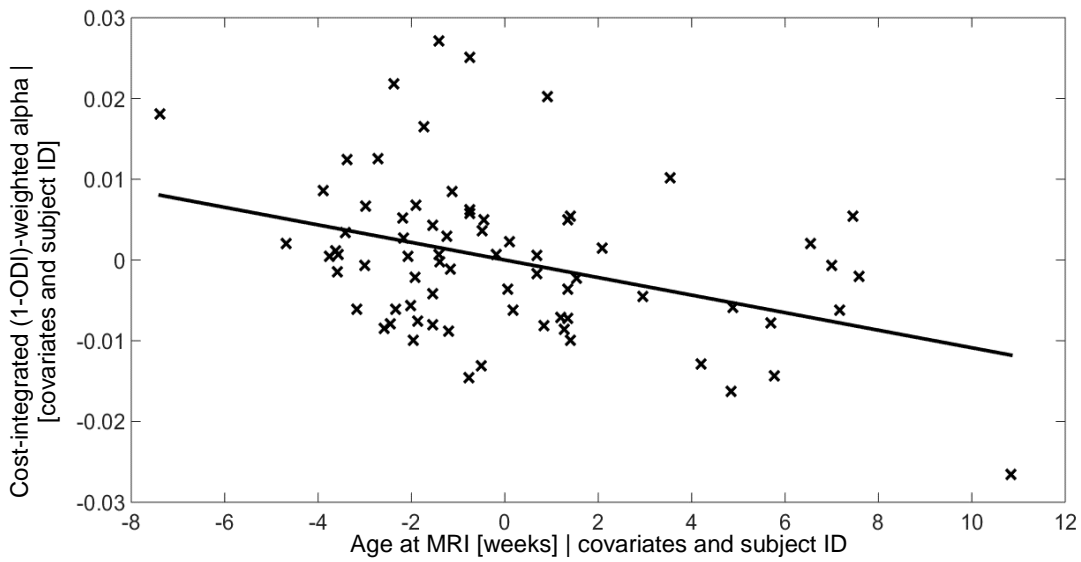

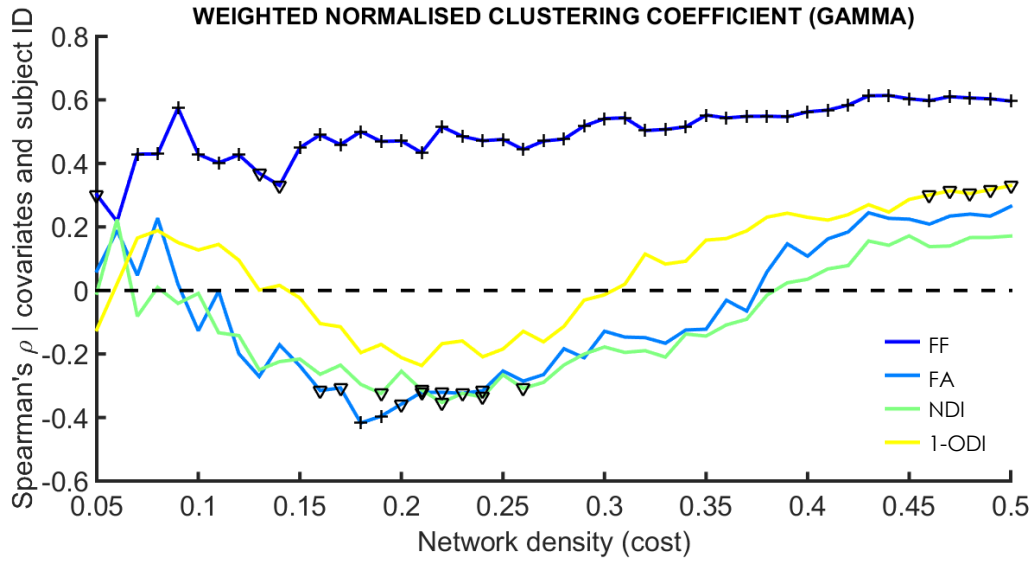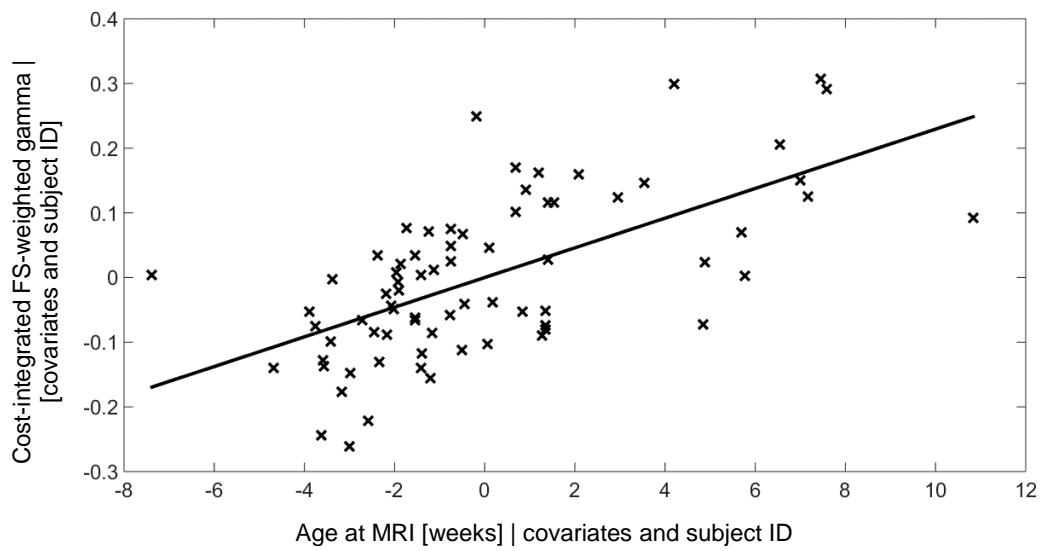

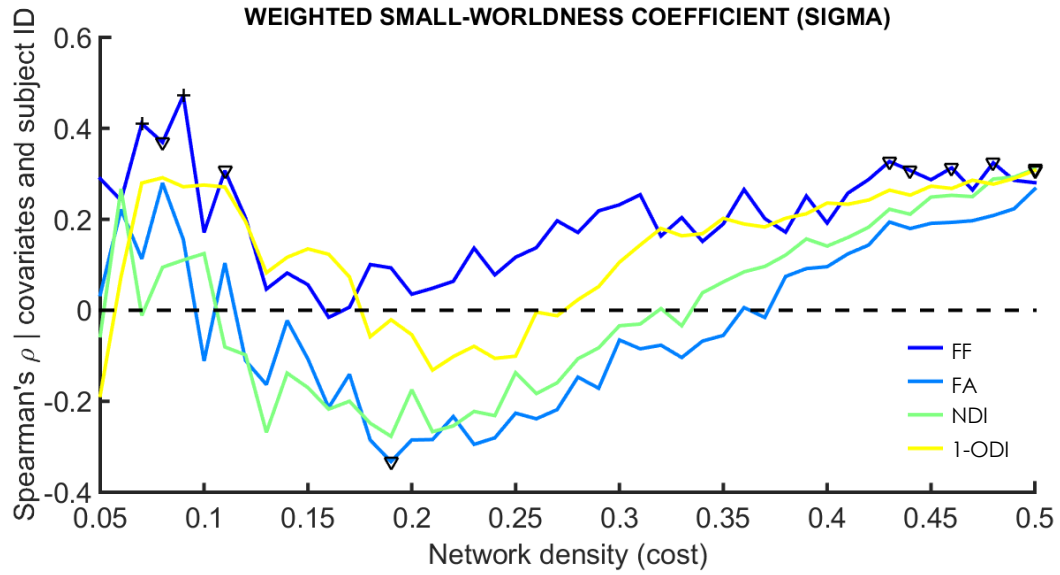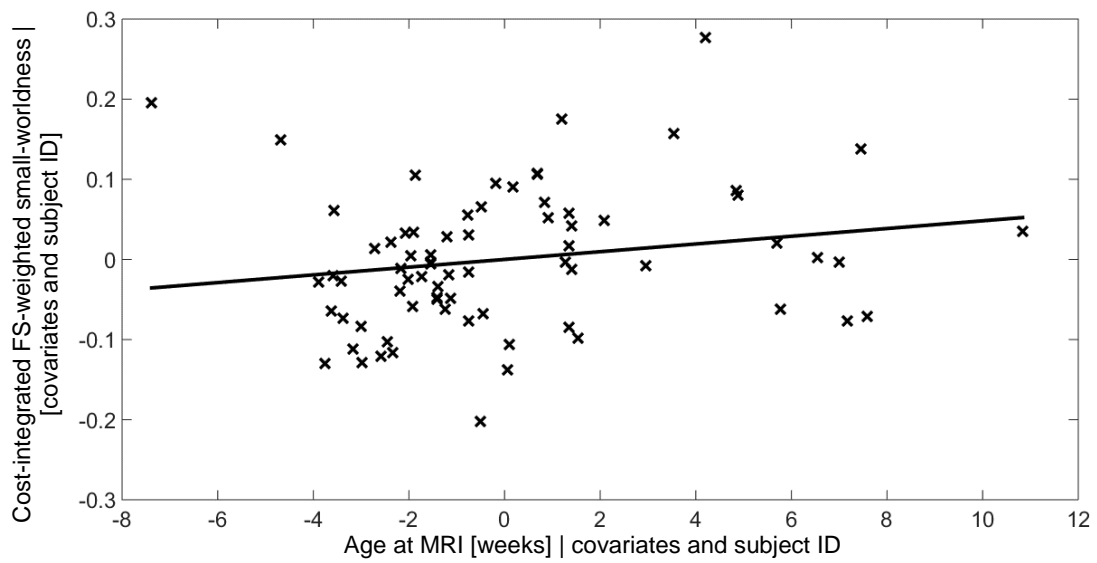

**Association with prematurity (GA at birth):**

Partial correlation of binary small-world features with age at birth was non-significant, only showing some tendency towards significance with cost-integrated  $\gamma$  ( $\rho=0.202$ ,  $p=0.087$ ).

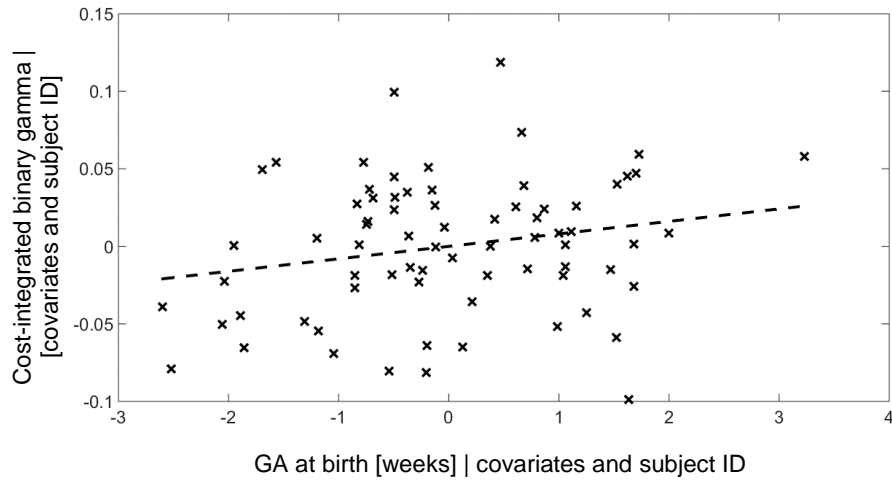

Association of weighted small-world features with prematurity was significant for NDI-weighted  $\alpha$  at several network densities (between 0.1 and 0.25) and after cost-integration ( $\rho=0.285$ ,  $p=0.015$ ). Consistently, weighted global efficiency normalised (divided) by the global efficiency of random equivalents was negatively correlated with age at birth for a similar range of network densities and after cost-integration ( $\rho=-0.342$ ,  $p=0.004$ ).



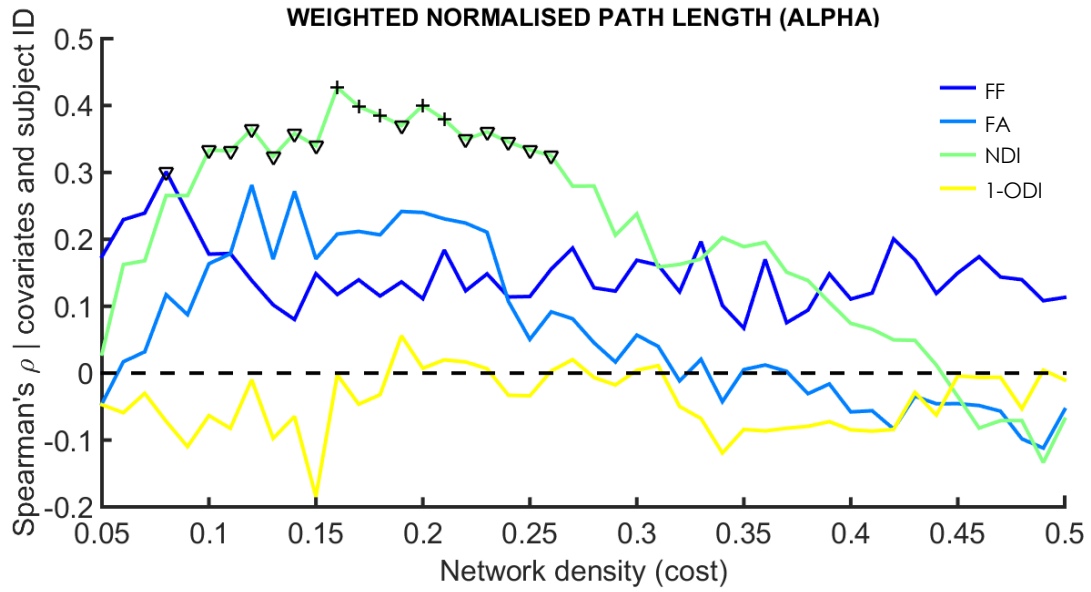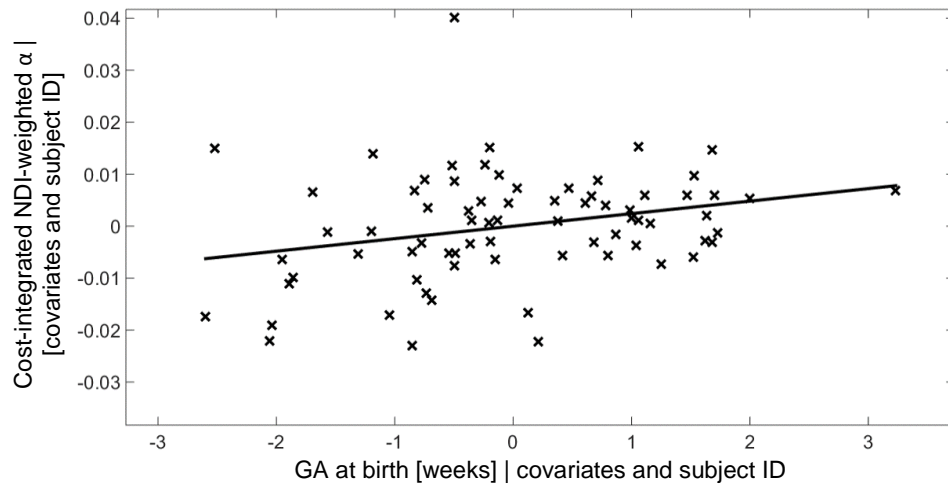

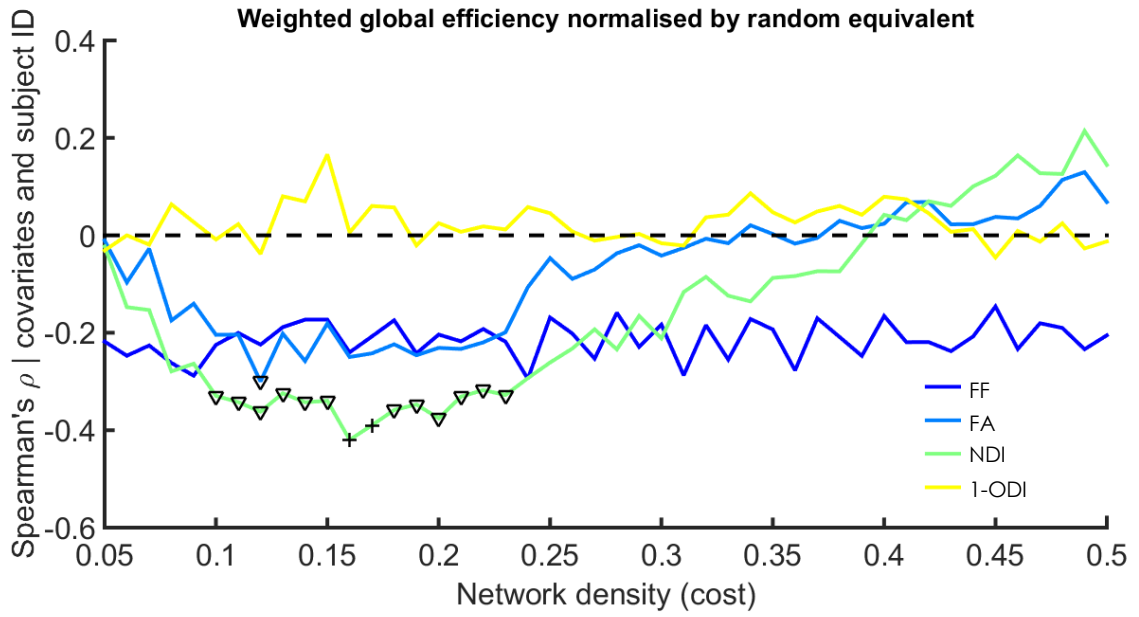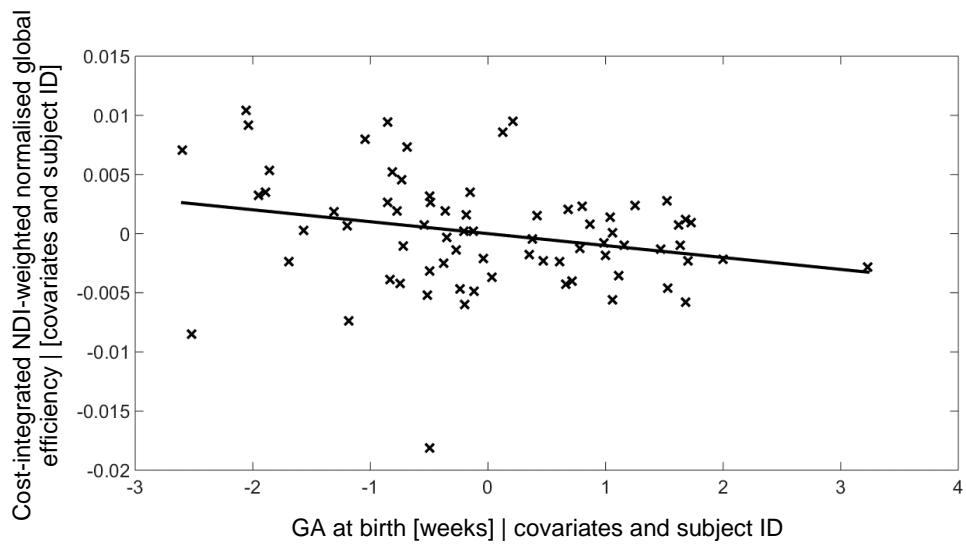

NDI-weighted normalised clustering coefficient ( $\gamma$ ), was weakly associated with age at birth, but remained significant after cost-integration ( $\rho=0.321$ ,  $p=0.006$ ). No significant association was found with small-worldness coefficient.

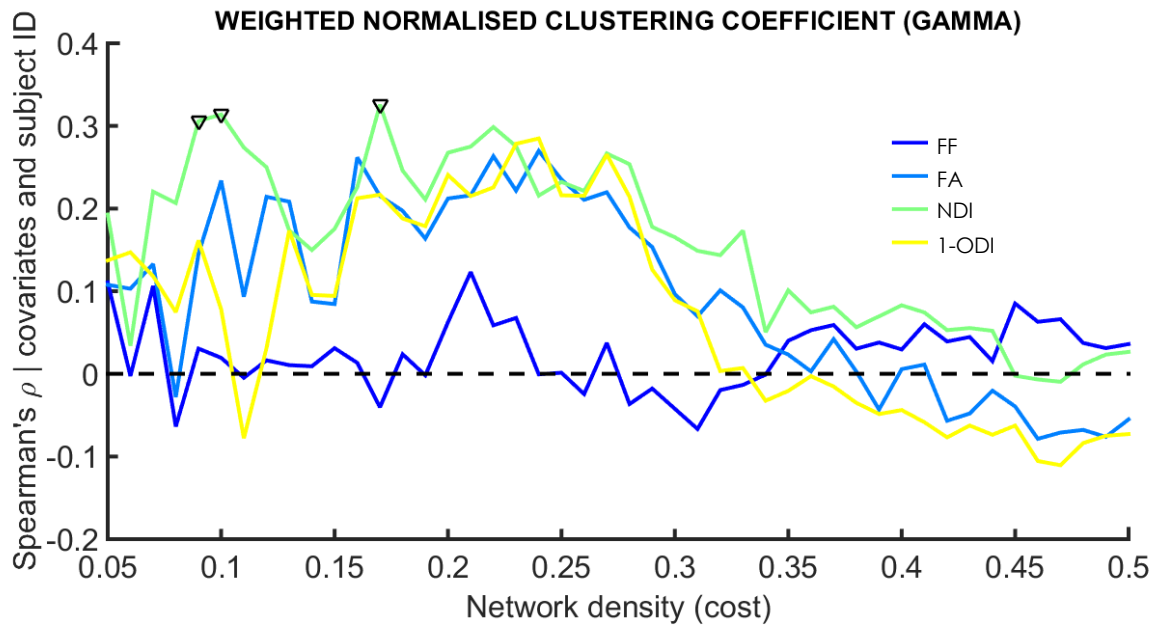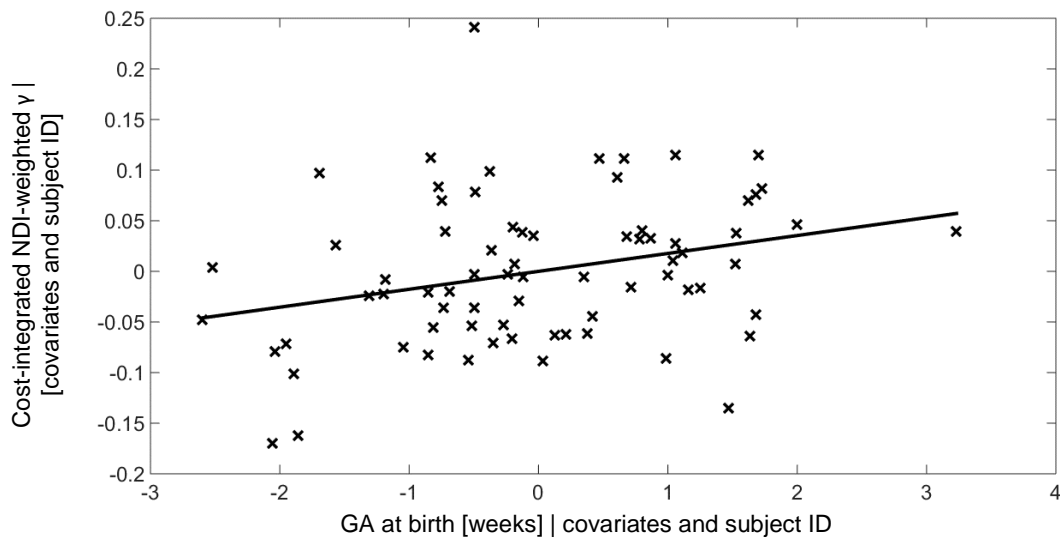

## REFERENCES

- Humphries MD, Gurney K. 2008. Network 'small-world-ness': a quantitative method for determining canonical network equivalence. *PLoS One* 3:e0002051.
- Maslov S, Sneppen K. 2002. Protein interaction networks beyond artifacts. *FEBS Lett* 530:255-256.
- Watts DJ, Strogatz SH. 1998. Collective dynamics of 'small-world' networks. *Nature* 393:440-442.

## 2. SUPPLEMENTARY FIGURES

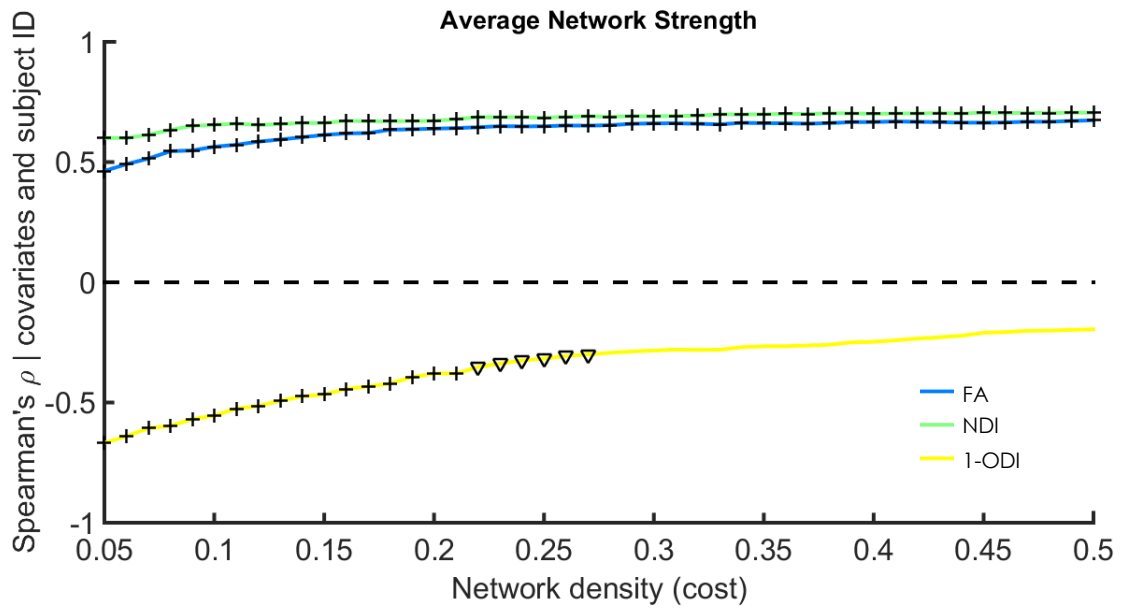

Supplementary Figure 1. Spearman's partial correlation of average FA- and NDI-weighted degree and age at MRI at different levels of network density.

+ $p < 0.001$ , ^ $p < 0.01$

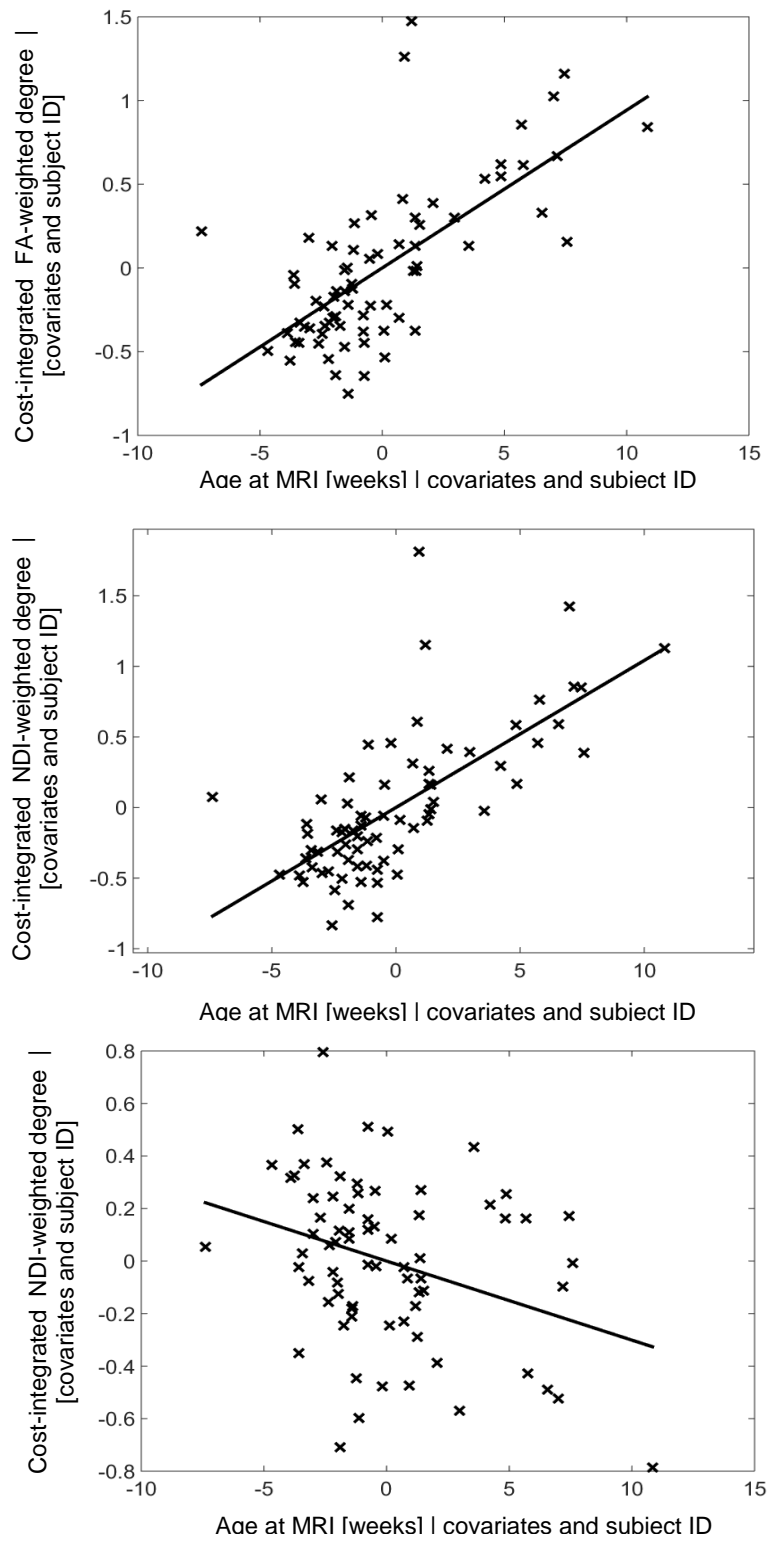

**Supplementary Figure 2.** Spearman's partial correlation of cost-integrated average FA- and NDI-weighted network degree and age at MRI

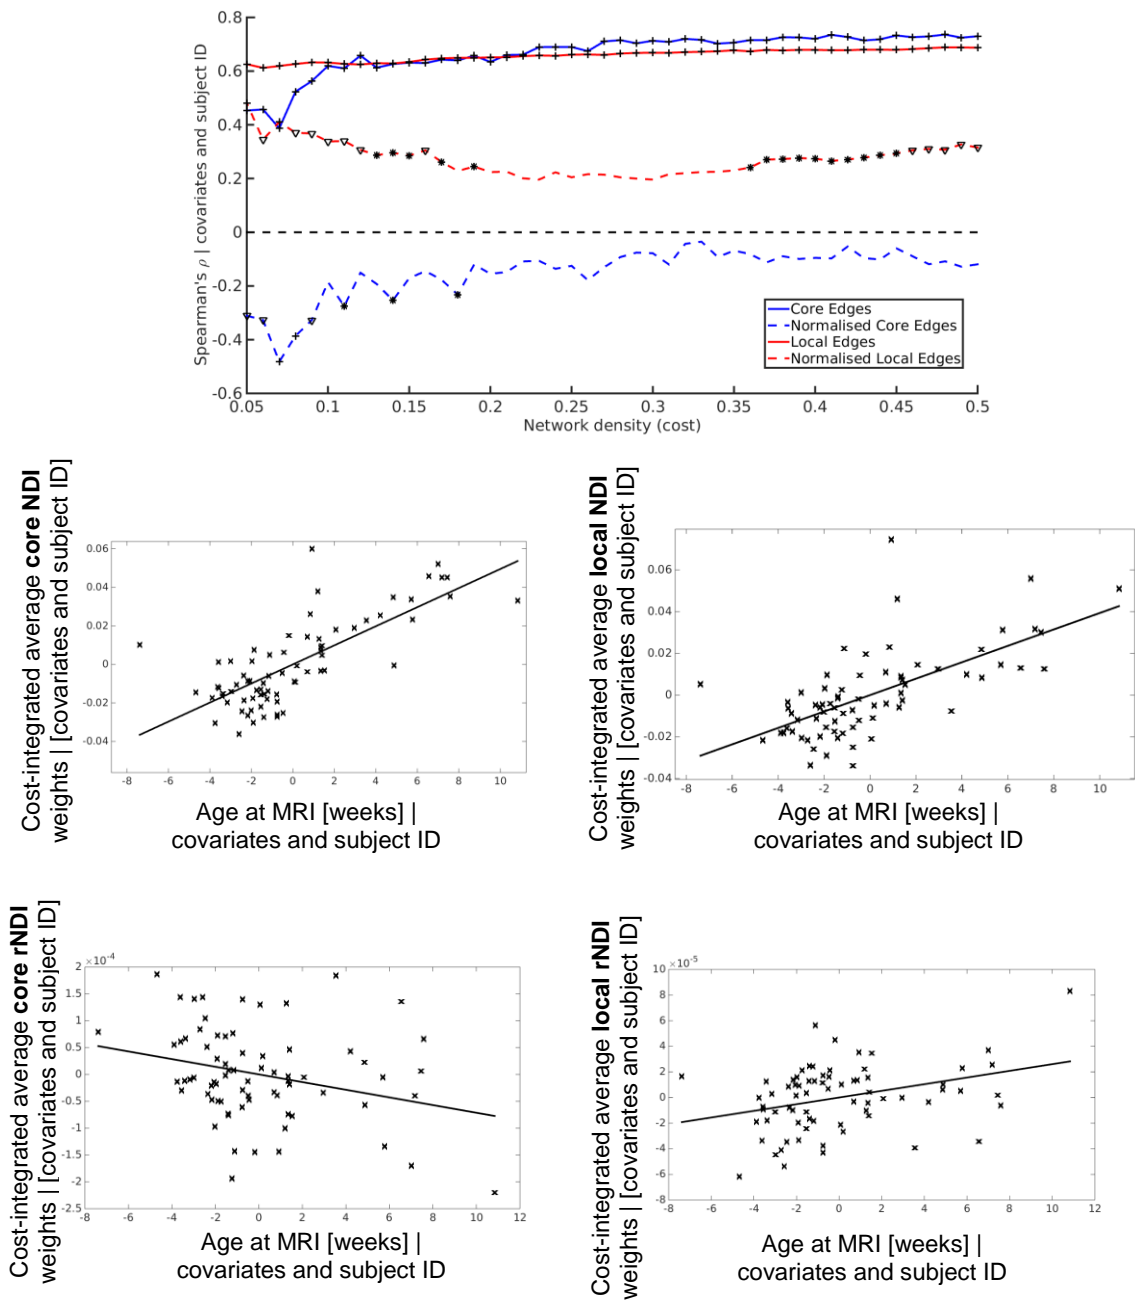

**Supplementary Figure 3.** Spearman's partial correlation of median NDI and rNDI weights of core and local connections with **age at MRI**, and significant cost-integrated results + $p < 0.001$ ,  $\wedge p < 0.01$ , \* $p < 0.05$

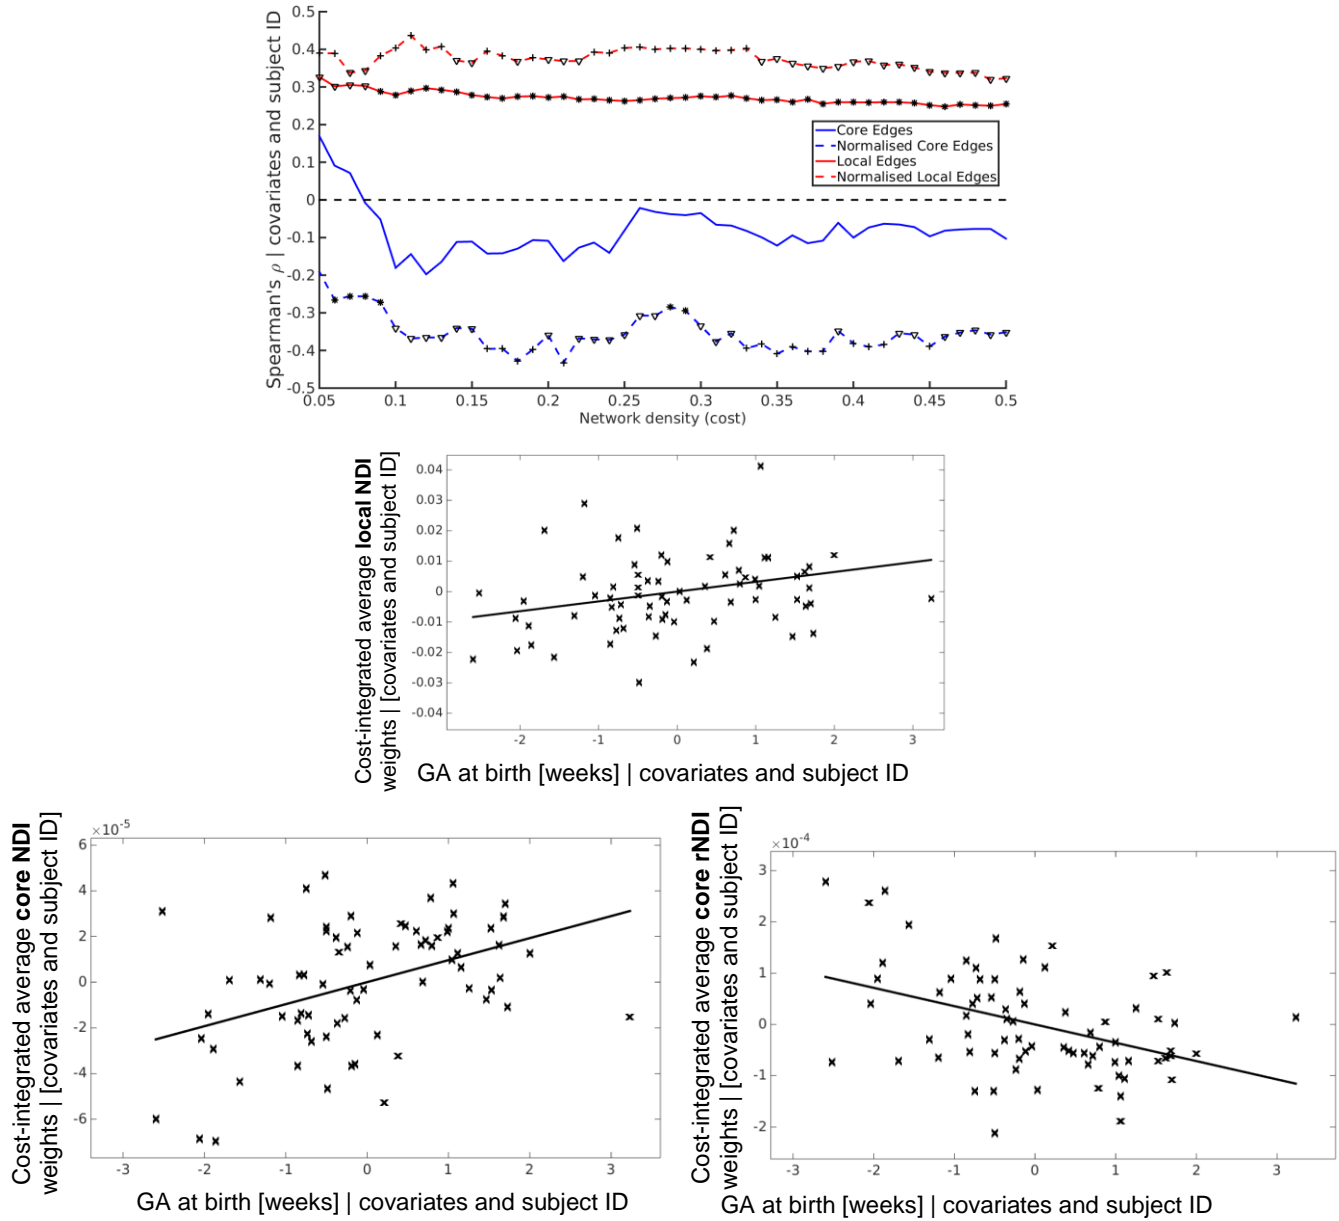

**Supplementary Figure 4.** Spearman's partial correlation of median NDI and rNDI weights of core and local connections with **GA at birth**, and significant cost-integrated results

+ $p < 0.001$ , ^ $p < 0.01$ , \* $p < 0.05$
